1 **Dextran sulfate sodium salt corrupted colonic crypts declined the smooth muscle**  
2 **tension in mouse large intestine**

3 Sun Yiwei<sup>1,2\*</sup>, Hu Aihua<sup>3\*</sup>, Fan shouyan<sup>1</sup>, Wei Lusi<sup>4</sup>, Shi Yuechuan<sup>5</sup>, Wen Lu<sup>1</sup>, Cham  
4 Mohamed Aden<sup>5</sup>, Gao Lingfeng<sup>1#</sup>, Wang Yang<sup>1#</sup>

5 1. Extreme environment sports medicine laboratory, Hainan medical college

6 2. International Nursing Department, Hainan medical college

7 3. Laboratory of morphology, Hainan medical college

8 4. Department of clinical medicine, Hainan medical college

9 5. Faculty MBBS Section, Hainan medical college

10

11 # Corresponding author: [katotds@sina.com](mailto:katotds@sina.com)

12 \* Joint first authors

13

14 **Abstract**

15 Ulcerative colitis is one kind of colonic mucosa damage, shows high number of  
16 inflammatory epithelial cells. Dextran sulfate sodium salt (DSS) induce a milder onset  
17 of colitis or a more aggressive response. It may damage the protective effects on  
18 intestinal barrier. In this study, we investigated the damaging of colon crypts,  
19 evaluated the smooth muscle tension beneath corrupted crypts in DSS exposed mice.

20 **Methods:** female specific-pathogen-free *BALB/C* mice (n=16) are randomly divided  
21 as: group A: control mice (n=4); group B: DSS-mice (colitis, 5% DSS in drink water,  
22 days 1 to 7, n = 12). The DSS is replaced every 2 days. On day 8, mice colons are  
23 excised from the colon-cecal junction to the anus. The distal colon segment is  
24 longitude incision and aberrant crypt area are determined by methylene blue staining  
25 method. The smooth muscle strip is separated and prepared for passive tension tests.  
26 The rest segment is fixed with 10% formalin and embedded in paraffin. Histological  
27 scores are evaluated in hematoxylin-eosin staining section: crypt damage (none = 0,  
28 basal 1/3 damaged = 1, basal 2/3 damaged = 2, only the surface epithelium is intact =  
29 3, and entire crypt and epithelium are lost = 4). The smooth muscle passive tension

30 beneath the aberrant crypt area in DSS-mice are tested and compared with the  
31 preparations from control mice. **Results:** In DSS uptake mice, the inflammation in  
32 large intestine mucosa damaged crypts with architectural distortions on day 7 (n=7).  
33 In crypts damage area, the smooth muscle passive tension and relative myogenic  
34 spontaneous contraction parameters are significantly reduced under the high preload  
35 conditions. The maximum rate of change of velocity of spontaneous contraction was  
36 noticeable attenuated. **Conclusion:** Our findings demonstrate that low dosage DSS  
37 water drink result in corrupted colonic crypts. The corrupted crypts damage the large  
38 intestinal epithelium barrier, affect the smooth muscle functions, which declined in  
39 myogenic spontaneous contraction under the preload. This further may reduce the  
40 peristalsis in large intestine.

41

#### 42 **Keywords**

43 dextran sulfate sodium salt, ulcerative colitis, aberrant crypt, myogenic spontaneous  
44 contraction, peristalsis

45

#### 46 **Introduction**

47 Dextran sulfate sodium salt (DDS) is polymer of sulfated polysaccharide, exerts  
48 chemical injury to the intestinal epithelium, resulting in exposure of the lamina  
49 propria (LP) and submucosal compartment to luminal antigens and enteric bacteria,  
50 triggering inflammation<sup>[1,2]</sup>. In ulcerative colitis, denervated smooth muscle tends to  
51 show an alteration in muscle tension responsiveness to the stimuli that due to  
52 abnormal mobilization of intracellular calcium. The identification of this abnormality  
53 may provide a potential avenue for future understanding of ulcerative colitis. In  
54 ulcerative colitis, crypt dropout, basal plasmacytosis with lymphoid aggregates, and  
55 giant cells in the lower region of the lamina propria was the typical morphological  
56 changes, which was accompanied by extension of submucosal smooth muscle bands  
57 between glands. Lamina propria forms the connective tissue core surrounding the  
58 crypt epithelium. The crypt and the lamina propria are separated by a distinct

59 basement membrane composed of an ultrastructural apparent basal lamina and a  
60 deeper network of collagenous fibers [3]. The pericryptal sheath surrounding colonic  
61 crypts is an effective barrier both to dextran movement. There is a greater  
62 accumulation of dextran in the crypt lumens of descending colon than in the caecal  
63 crypts whereas no such structure surrounds the caecal crypts [4]. Low dietary Na<sup>+</sup>  
64 intake raised rat plasma aldosterone and stimulated distal pericryptal sheath growth  
65 and adhesiveness as shown by increased amounts of F-actin, smooth muscle actin,  
66  $\beta$ -catenin and E-cadherins in the pericryptal zone [5]. The accumulation of smooth  
67 muscle actin was relative to the muscle spasms in persistent in involuntary muscle  
68 contractions [6],  $\beta$ -catenin is reported function as a novel mediator of glucose transport  
69 in muscle and may contribute to insulin-induced actin-cytoskeleton remodelling to  
70 support GLUT4 translocation [7], which exerts a major effect on smooth muscle  
71 contractile and relaxation responses [8]. The increasing of smooth muscle tone, that  
72 arises from disrupted crypt architecture, was thought through the distinct  
73 mechanotransductive signaling mechanisms [9]. The determination of maximum  
74 velocity of shortening was depending on the mechanical preload on the muscle [10].  
75 Muscle's passive tension arises from elastic spring-like elements stretched beyond  
76 their resting length. The characteristic of smooth muscles is that at the length which  
77 will give the maximal active tension, they characteristically have considerable passive  
78 tension. This is, aside from striation, the big difference between smooth and skeletal  
79 muscle.

80 The large intestine circular smooth muscle layer causes its wall to form haustra which  
81 disappeared when muscle tone was lost. Its contraction causes the food to be churned  
82 and maximizing absorption. The smooth muscle passive tension (PT), which is the  
83 passive stiffness component, is the mechanical compound to initiate the circular  
84 smooth muscle contraction. The large intestine smooth muscle are regulated by  
85 biochemical pathways and represents intracellular crosslinks. Foci of lamina propria  
86 inflammation, edema, aphthous ulcers, and focal crypt injury produce an irregular  
87 distribution of crypts in the lamina propria. This may infect the smooth muscle, affect

88 the activity of smooth muscle. A decrease in the intracellular concentration of  
89 activator  $\text{Ca}^{2+}$  elicits smooth muscle cell relaxation. Several mechanisms are  
90 implicated in the removal of cytosolic  $\text{Ca}^{2+}$  and involve the sarcoplasmic reticulum  
91 and the plasma membrane.  $\text{Ca}^{2+}$  uptake into the sarcoplasmic reticulum is dependent  
92 on ATP hydrolysis. The aberrant crypt altered calcium signaling in colonic smooth  
93 muscle<sup>[11]</sup>.

94 In this study we investigated DDS water uptake induced aberrant crypt in mice,  
95 evaluated the smooth muscle passive tension and relative myogenic spontaneous  
96 contraction beneath the aberrant crypt.

97

## 98 **Methods:**

### 99 *Animal*

100 A total of 16 specific-pathogen-free *BALB/C* mice (aged 8 to 10 weeks, weighing  
101 20–24g) were purchased from the Laboratory Animal Center of Hainan Medical  
102 College (Hainan island, China), maintained in clean cages under a 12h light-dark  
103 cycle and conventional housing conditions, fed with standard mouse chow. All animal  
104 experiments were performed in accordance with the National Institutes of Health  
105 Guide for the Care and Use of Laboratory Animals, and the protocol was approved by  
106 the Animal Ethics Committee of Hainan Medical College (Approval ID: Q20170013).  
107 5% DSS (0216011080, MW 36–50 kDa, MP Biomedicals) in drinking water was used  
108 to induce acute colitis. The DSS was replaced every 2 days. Mice were randomly  
109 divided and treated as follows: group A (normal, n = 4): mice received sham (saline,  
110 days 1 to 14); group B (DSS uptake, n = 12). At day 15, all animals were  
111 euthanatized.

112

### 113 *The determination of large intestine aberrant crypt area*

114 The large intestine was excised from the colon-cecal junction to the anus, and the  
115 lengths of the colon were measured. After the mice large intestines were removed  
116 from the abdominal cavity. The segment of the distal segment was taken and

117 immediately immersed in *Ringer's* solution (pH7.4). The segment was transverse axis  
118 midline incision. The internal luminal wall and the surface of the villus epithelium  
119 was stained by methylene blue staining method. The aberrant crypt area referenced  
120 the method of Gupta AK<sup>[12]</sup>, McGinley JN<sup>[13]</sup>. After staining, the aberrant crypt area  
121 was easily distinguished from surrounding normal mucosa in intact large intestine  
122 wall under the microscope. The large intestine wall of aberrant crypt area was  
123 obtained by ophthalmic scissors and prepared for the further analysis.

124

#### 125 *The histological scores*

126 The distal segment was fixed with 10% formalin and embedded in paraffin. Paraffin  
127 sections (4  $\mu$ m) were stained with hematoxylin-eosin (H&E). Histological scores were  
128 evaluated as follow: inflammation (none=0, slight=1, moderate=2, and severe=3),  
129 inflamed area/extent (mucosa=1, mucosa and submucosa=2, and transmural=3), crypt  
130 damage (none=0, basal 1/3 damaged=1, basal 2/3 damaged=2, only the surface  
131 epithelium is intact=3, and entire crypt and epithelium are lost=4), and percent  
132 involvement (1–25% = 1, 26–50% = 2, 51–75% = 3, and 76–100% = 4).

133

#### 134 *The large intestine smooth muscle tissue preparation*

135 The smooth muscle layer of aberrant crypt area was separated from the entire colonic  
136 mucosa in large intestine wall using Adson forceps. The smooth muscle strip endings  
137 were ligatured and stable in *Ringer's* solution for further analysis.

138

#### 139 *The smooth muscle strip passive tension measurement*

140 The passive tension and myogenic spontaneous contraction of longitude smooth  
141 muscle strips beneath aberrant crypt, and non-aberrant crypt area were evaluated. The  
142 strips were one end fixed on the tension transducer (model JZ-100, Beijing institute of  
143 aerospace medical engineering, Beijing, China), the other end was fixed on micro step  
144 tuning. The transducer was connected to the physiological polygraph device  
145 (BL-420S, Chengdu Taimeng software Co. Ltd., China). The strips were longitude

146 stretched to obtain a 1gram preload (1g, low preload), then rapid stretch to obtain a  
147 passive tension curve. The muscle strip was further slowly longitude stretched to  
148 obtain 5gram (5g, high preload), then rapid stretch to obtain the passive tension curve  
149 under the high preload. Under the preload condition, in each rapid stretch the muscle  
150 strip was extended 0.1mm on its longitude axis, and stretched 5 time continually. The  
151 passive tension and relaxation period after each rapid stretch were recorded. The  
152 myogenic spontaneous contraction amplitude ( $A_s$ ), maximum contraction velocity  
153 ( $V_{max}$ ), maximum instantaneous contraction force ( $F_{max}$ ) were analyzed. The data were  
154 compared with control mice.

155

## 156 **Statistics**

157 The large intestine crypts images are representative of at least three independent  
158 experiments. The mean value of myogenic spontaneous contraction  $A_s$ ,  $V_{max}$ ,  $F_{max}$   
159 from 5 steps and standard error of mean (SEM) was calculated and compared between  
160 DSS uptake and control mice. P values were calculated by Mann-Whitney U Test  
161 (Microsoft Excel 2019, version 1808). P value < 0. 05 was considered significant.

162

## 163 **Results**

### 164 *The histological changes*

165 **Figure 1a** is the large intestine distal segment colitis sample from the DSS-mice. In  
166 control mice, the large intestine consists of a crypt/villus and crypt/surface epithelium  
167 unit, respectively. The bulk of the villus and surface epithelium is composed of  
168 differentiated columnar epithelial cells that are divided into absorptive cells for  
169 enterocytes and secretory cells. The locations of the multi-potent stem cells where the  
170 crypt progenitor cells differentiated to epithelial cells are located in the crypt  
171 compartment (**Figure 1b**, red Square frame). In DSS-mice, the crypt image features  
172 showed significant differences to the control mice. **Figure 1c** shows examples of  
173 histology of DSS-mice aberrant crypt. The crypt structures tend to be not uniform in  
174 size and loss the general shape across the field of view. The crypt tubular shape in

175 transverse view is lost the regular. Collagen distribution appears relatively even  
176 throughout the field of view. The crypt bottom has early dysplasia, and tend to vary in  
177 size across the field of view.

178

179

180

181

182

183

184

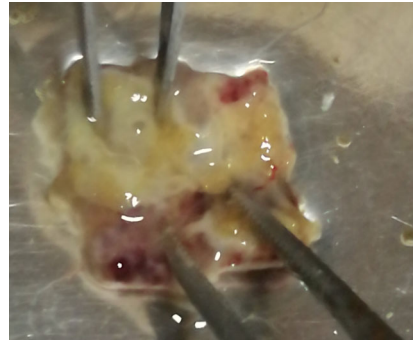

185

186

187

188

189

190

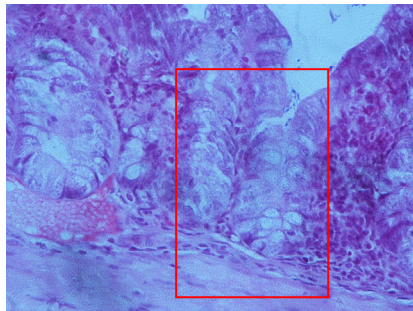

b.

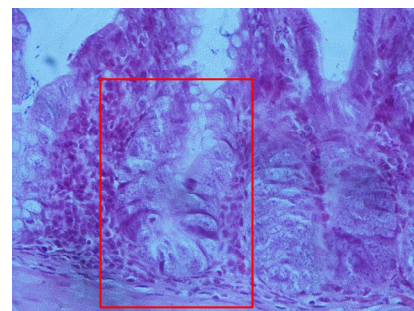

c.

191

192 **Fig. 1** The colitis and crypts changes of the large intestinal mucosa in DSS-mice

193

194 The histological scores in DSS-mice distal segment are evaluated as follow: 1) The  
195 inflammation (none, n=0; slight, n=5; moderate, n=6; severe, n=3). 2)The inflamed  
196 area or extent (mucosa, n=4; mucosa and submucosa, n=6, transmural, n=6).3) The  
197 crypt damage (none, n=2; basal damaged, n=8; only the surface epithelium is intact,  
198 n=3; entire crypt and epithelium are lost, n=1). 4) The percent involvement (1–25%,  
199 n=7, 26–50% , n=5, 51– 75%, n=2, 76–100%, n=0). The results are summarized in

200 **Table 1.**

201

202

203

204 **Table 1** The large intestine wall histological score in DSS uptake mice (n=12)

205

| Inflammation |   | Inflamed area/extent |   | Crypt damage                   |   | Percent involvement |   |
|--------------|---|----------------------|---|--------------------------------|---|---------------------|---|
| none         | 0 | mucosa               | 4 | none                           | 2 | 1–25%               | 7 |
| slight       | 5 | mucosa/submucosa     | 6 | basal 1/3 damaged              | 4 | 26–50%              | 5 |
| moderate     | 6 |                      |   | basal 2/3 damaged              | 4 | 51–75%              | 2 |
| severe       | 3 |                      |   | Only surface epithelium intact | 3 | 76–100%             | 0 |
|              |   | transmural           | 6 | entire crypt/epithelium lost   | 1 |                     |   |

209

210

211 *The smooth muscle spontaneous contraction beneath aberrant crypt area*

212 The toxic colitis occurs when inflammation extends into the smooth muscle layer of  
 213 the intestinal wall. In the smooth muscle preparation that obtained from the aberrant  
 214 crypt area, we tested the rapid stretch induced myogenic spontaneous contraction  
 215 under the preload conditions.

216 When the muscle strip lengthens to obtain a 1gram (1g, initial preload), the initial  
 217 passive tension curve has no difference between DSS treated and control preparation.  
 218 The significant difference is observed after rapid stretch and the smooth muscle  
 219 bearing the lengthening after the stretch. In control mice, under the low preload  
 220 condition, each rapid stretch induce a myogenic spontaneous contraction that  
 221 followed the maximum passive tension (**Figure. 2a**), however, the amplitude of  
 222 myogenic spontaneous contraction have variation after each stretch (the \* marked  
 223 peak wave). Under the high preload condition, each rapid stretch induce significant  
 224 myogenic spontaneous contraction that tightly closed to the maximum passive tension  
 225 peak wave (**Figure. 2b**), however, the amplitude of myogenic spontaneous  
 226 contraction have significantly increased after each stretch (the \* marked peak wave).

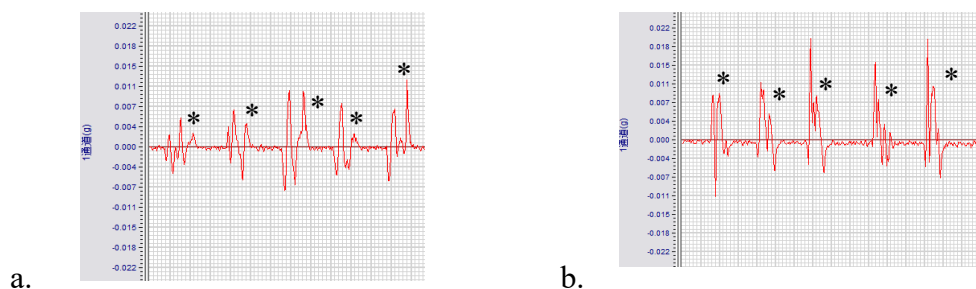

232 **Fig. 2** The rapid stretch induced myogenic spontaneous contraction



233 Under the low preload, the rapid stretching induced a significant passive tension  
234 ( $PT_{max}$ ) in control mice, however the  $PT_{max}$  is significantly reduced in DSS-mice. The  
235  $PT_{max}$  ratio between high preload and low preload is significantly reduced (**Figure.**  
236 **3a**). The myogenic spontaneous contraction amplitude  $A_s$  ratio between high preload  
237 and low preload is significantly low in DSS-mice (**Figure. 3b**).

238

239

240

241

242

243

244

245

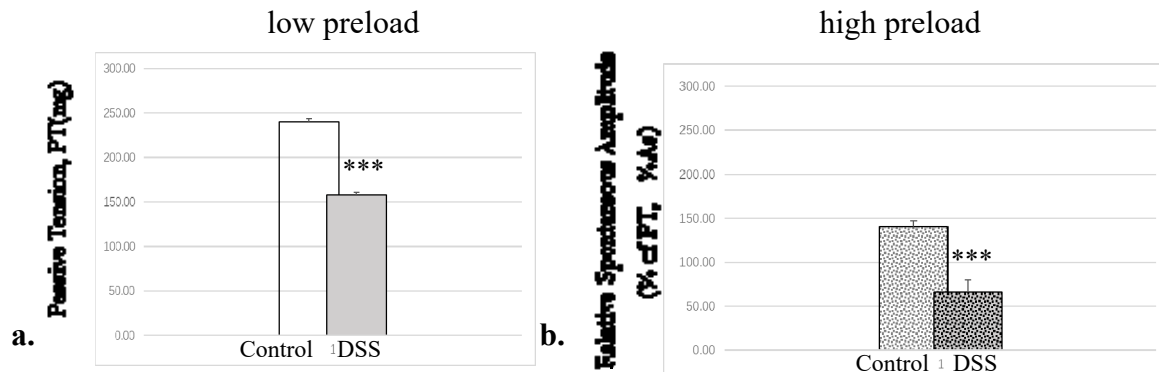

246

**Fig 3** The smooth muscle passive tension amplitude in DSS-mice

247

248 The rapid stretch induced maximum velocity of myogenic spontaneous contraction  
249 ( $V_{max}$ ) is significantly low in the high preload preparation (compare with the control  
250 mice, **Figure 4b**, the dot gray column). However, the maximum velocity of myogenic  
251 spontaneous contraction ( $V_{max}$ ) have no significantly changes in the low preload  
252 preparation (compare with the control mice, **Figure 4a**, the gray column). Meanwhile,  
253 the maximum instantaneous contraction force ( $F_{max}$ ) of the myogenic spontaneous  
254 contraction have significantly reduced under the high preload condition (**Figure 4d**,  
255 the dot gray column),. However, the  $F_{max}$  of myogenic spontaneous contraction have  
256 no significantly changes in the low preload preparation (compare with the control  
257 mice, **Figure 4c**, the gray column). The  $V_{max}$  and  $F_{max}$  of control and DSS-mice are  
258  $38.99 \pm 6.95$  to  $38.39 \pm 4.82$  g/sec (\*\*\*,  $p < 0.001$ ) and  $101.78 \pm 67.41$  to  $62.50 \pm 12.31$   
259 g/sec (\*\*\*,  $p < 0.001$ ), respectively.

260 The  $V_{max}$  and  $F_{max}$  significantly reduced in DSS-mice indicated that smooth muscle  
261 myogenic spontaneous contraction (active contraction) was weakening beneath the

262 aberrant crypt area.

263 low preload

high preload

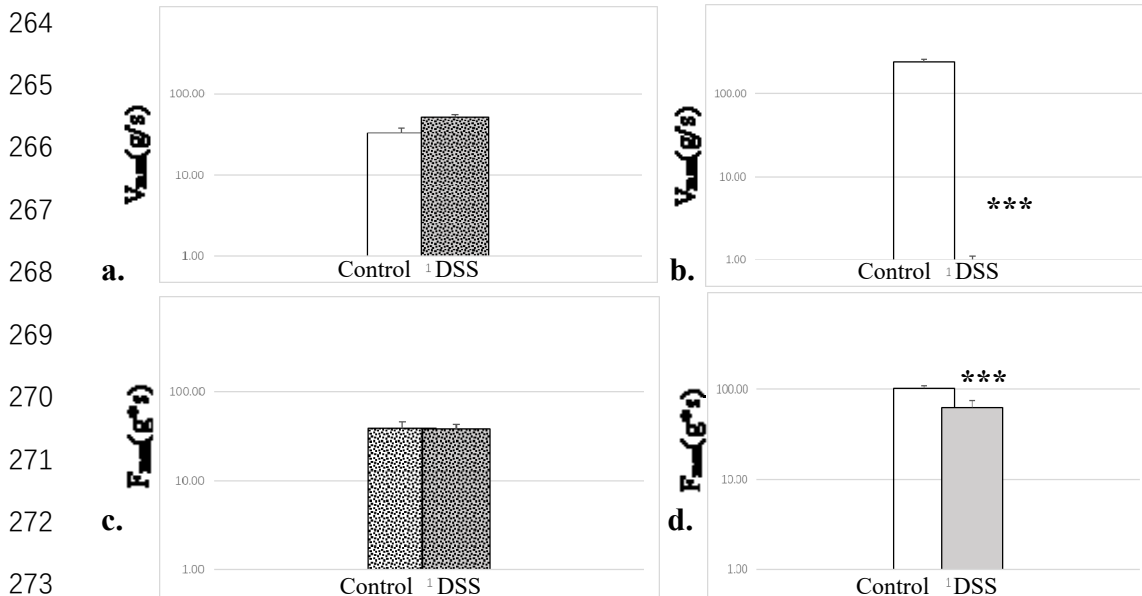

274 **Fig. 4** The myogenic spontaneous contraction in DSS-mice

275

## 276 Discussion

277 The intestinal epithelium withstands continuous mechanical, chemical and biological  
278 insults despite its single-layered, simple epithelial structure. The crypt-villus  
279 architecture in combination with rapid cell turnover enables the intestine to act both as  
280 a barrier and as the primary site of nutrient uptake. Constant tissue replenishment is  
281 fueled by continuously dividing stem cells that reside at the bottom of crypts. Dextran  
282 sulphate sodium (DSS) induced imbalance in key signaling pathways can cause the  
283 initiation of large intestine disease. DSS induced colitis is a reproducible model that  
284 morphologically and symptomatically resembles ulcerative colitis in human. This  
285 compound mainly affects the large intestine, especially middle and distal third of large  
286 intestine [14]. Most of the reports suggested that DSS causes erosions with complete  
287 loss of surface epithelium because of its direct toxic effect on epithelial cells. In the  
288 mammalian intestine, crypts of Lieberkühn house intestinal epithelial stem/progenitor  
289 cells at their base. During homeostasis, differentiated colonocytes metabolized  
290 butyrate likely preventing colitis from reaching proliferating epithelial

291 stem/progenitor cells within the crypt. Exposure of stem/progenitor cells *in vivo* to  
292 butyrate through either mucosal injury or application to a naturally crypt-less host  
293 organism led to inhibition of proliferation and delayed wound repair <sup>[15]</sup>.

294 DSS dosage is a key factor in mucosa damaging. 1% DSS for 9 days and 2% DSS for  
295 6 days minimum induces colitis in male wild type rats <sup>[16]</sup>. The severity of colitis i.e.  
296 mild, moderate, severe colitis may be varied by varying the DSS treatment period.  
297 Administering 3%, w/v DSS for 7 days and sacrificing on the 8th day induces mild  
298 colitis whereas moderate colitis is induced by administering 3% DSS for a period of  
299 14 days i.e. from days 1 to 7 and 22 to 28 and then sacrificing animals on the 29th day  
300 <sup>[17]</sup>. Our results suggested that the low dosage of DSS uptake through the drink water  
301 damaged crypts. The histological score indicated that more than half of the DSS-mice  
302 have the morphological damage in distal segment (n=8), 12 of the DSS-mice were  
303 submucosa transmural inflamed. This perhaps induced by reducing in *Lactobacillus*  
304 *sp.* and protective short-chain fatty acid production, and alter gut immune homeostasis  
305 and lead to increased vulnerability to inflammatory insults <sup>[18]</sup>.

306 The toxic colitis occurs when inflammation extends into the smooth muscle layer of  
307 the intestinal wall, paralyzing the colon muscle. This may lead to colon dilatation, and  
308 sometimes perforation. In physiological intestine, the frequency of contractions was  
309 controlled by constitutive nitric oxide. In colitis induced transient increases in the  
310 amplitude of spontaneous contractions coincident with a loss of nitric oxide synthase  
311 activity. The initial colitis induced a remodeling of the neural control of spontaneous  
312 contractions reflecting changes in their regulation by constitutive nitric oxide synthase  
313 and iNOS <sup>[19]</sup>. In this study the denervation smooth muscle is prepared for  
314 investigating the myogenic contraction. The smooth muscle layer beneath the aberrant  
315 crypt area are significantly reduction of its passive tension under the high preload  
316 condition. This indicated the low stiffness of the smooth muscle after DSS toxic  
317 inflammation and the aberrant crypt formation. This evidence may relative to the  
318 colon dilatation and perforation in the toxic colitis.

319 The smooth muscle myogenic contraction can be demonstrated in the autoregulation

320 of the cavity organs. The studies of urinary bladder detrusor indicate that spontaneous  
321 contraction is responsible for regenerating adjustable preload stiffness <sup>[20]</sup> and for  
322 length adaptation <sup>[21]</sup>. Strength of the myogenic response is greatest when the intestine  
323 wall opposite to the intraluminal pressure and the enlargement of the lumen. Strength  
324 varies in different intestine segment. The different of the myogenic response also  
325 observed in variation of internal environment. In this study, passive tension amplitude  
326 is responsible for the preload conditions, and the myogenic spontaneous contraction is  
327 responsible for the smooth muscle beneath the aberrant crypt area. Both in control  
328 mice and DSS-mice, the large intestine smooth muscle exhibits the phasic myogenic  
329 contraction independent of neural input. In addition, the amplitudes of contraction are  
330 muscle length dependent, and amplitude increasing at longer muscle lengths. The  
331 myogenic retrogression response is consistent with the DSS toxicity induced crypt  
332 damaging.

333

### 334 **Acknowledgement**

335 This study was sponsored by Hainan provincial college student innovation and  
336 entrepreneurship project (No. S201911810023).

337

### 338 **Competing Interests:**

339 No potential competing interests.

340

### 341 **Reference**

- 342 1. Solomon L, Mansor S, Mallon P, Donnelly E, Hoper M, Loughrey M, Kirk S,  
343 Gardiner K. The dextran sulphate sodium (DSS) model of colitis: an overview. *Comp*  
344 *Clin Pathol.*2010, 19:235–239.
- 345 2. Eichele DD, Kharbanda KK. Dextran sodium sulfate colitis murine model:  
346 An indispensable tool for advancing our understanding of inflammatory bowel  
347 diseases pathogenesis. *World J Gastroenterol.* 2017 Sep 7;23(33):6016-6029.
- 348 3. Gaëlle Boudry, Mary H. Perdue, in *Encyclopedia of Gastroenterology*, 2004

- 349 4. Naftalin, R. J., Zammit, P. S. & Pedley, K. C. (1999). Regional differences in rat  
350 large intestinal crypt function in relation to dehydrating capacity *in vivo*. Journal of  
351 Physiology. 1999, 514: 201-210.
- 352 5. Naftalin RJ, Pedley KC. Regional crypt function in rat large intestine in relation to  
353 fluid absorption and growth of the pericryptal sheath. Journal of Physiology. 1999,  
354 514: 211—227.
- 355 6. Teh N, Leow LJ. The Role of Actin in Muscle Spasms in a Case Series of Patients  
356 with Advanced Basal Cell Carcinoma Treated with a Hedgehog Pathway Inhibitor.  
357 Dermatol Ther. 2020, <https://doi.org/10.1007/s13555-020-00464-x>
- 358 7. Masson SWC, Sorrenson B, Shepherd PR, Merry TL.  $\beta$ -catenin regulates muscle  
359 glucose transport via actin remodelling and M-cadherin binding. Mol Metab. 2020,  
360 42:101091. doi: 10.1016/j.molmet.2020.101091.
- 361 8. Atkins KB, Seki Y, Saha J, Eichinger F, Charron MJ, Brosius FC. Maintenance of  
362 GLUT4 expression in smooth muscle prevents hypertension-induced changes in  
363 vascular reactivity. Physiol Rep. 2015 Feb 12;3(2):e12299.
- 364 9. Seiler C, Davuluri G, Abrams J, Byfield FJ, Janmey PA, Pack M. Smooth muscle  
365 tension induces invasive remodeling of the zebrafish intestine. PLoS Biol.  
366 2012;10(9):e1001386.
- 367 10. Gordon AR, Siegman MJ. Mechanical properties of smooth muscle. I.  
368 Length-tension and force-velocity relations. Am J Physiol. 1971, 221(5):1243-1249.
- 369 11. Touw K, Chakraborty S, Zhang W, Obukhov AG, Tune JD, Gunst SJ, Herring BP.  
370 Altered calcium signaling in colonic smooth muscle of type 1 diabetic mice. Am J  
371 Physiol Gastrointest Liver Physiol. 2012, 302(1): G66-76.
- 372 12. Gupta AK, Pinsky P, Rall C, Mutch M, Dry S, Seligson D, Schoen RE. Reliability  
373 and accuracy of the endoscopic appearance in the identification of aberrant crypt foci.  
374 Gastrointest Endosc. 2009;70(2):322-330.
- 375 13. McGinley JN, Thompson MD, Thompson HJ. A method for serial tissue  
376 processing and parallel analysis of aberrant crypt morphology, mucin depletion, and  
377 Beta-catenin staining in an experimental model of colon carcinogenesis. Biol Proced

- 378 Online. 2010, 18;12(1):9032.
- 379 14. Perše M, Cerar A. Dextran sodium sulphate colitis mouse model: traps and tricks.  
380 J Biomed Biotechnol. 2012;2012:718617.
- 381 15. Dou XJ, Gao N, Yan D, Shan AS. Sodium butyrate alleviates mouse colitis by  
382 regulating gut microbiota dysbiosis. *Animals(Basel)*. 2020, 7;10(7):1154.
- 383 16. Iwaya H, Fujii N, Hagio M, Hara H, Ishizuka S. Contribution of dipeptidyl  
384 peptidase IV to the severity of dextran sulfate sodium-induced colitis in the early  
385 phase. *Biosci Biotechnol Biochem*. 2013;77:1461-1466.
- 386 17. Randhawa PK, Singh K, Singh N, Jaggi AS. A review on chemical-induced  
387 inflammatory bowel disease models in rodents. *Korean J Physiol Pharmacol*. 2014,  
388 18(4):279-288.
- 389 18. Miranda PM, De Palma G, Serkis V, Lu J, Louis-Auguste MP, McCarville JL,  
390 Verdu EF, Collins SM, Bercik P. High salt diet exacerbates colitis in mice by  
391 decreasing *Lactobacillus* levels and butyrate production. *Microbiome*. 2018, 6:57.
- 392 19. Bossone C, Hosseini JM, Eiro-Carrero VP, Shea-Donohue T. Alterations in  
393 spontaneous contractions in vitro after repeated inflammation of rat distal colon. *Am J*  
394 *Physiol Gastrointest Liver Physiol*. 2001, 280: G949–G957.
- 395 20. Almasri AM, Ratz PH, Bhatia H, Klausner AP, Speich JE. Rhythmic contraction  
396 generates adjustable passive stiffness in rabbit detrusor. *J Appl Physiol*. 2010,  
397 108:544–553.
- 398 21. Speich JE, Wilson CW, Almasri AM, Southern JB, Klausner AP, Ratz PH.  
399 Carbachol-induced volume adaptation in mouse bladder and length adaptation via  
400 rhythmic contraction in rabbit detrusor. *Ann Biomed Eng*. 2012, 40:2266–2276.
- 401
